# Supplementary material for: The Protective Performance of Modern Motorcycle Helmets Under Oblique Impacts
Source: PubMed Central journal article supplement (PMC9652253; doi:10.1007/s10439-022-02963-8), 2022-04-13
Supplement: 10439_2022_2963_MOESM1_ESM.pdf [file 10439_2022_2963_MOESM1_ESM.pdf]

## Appendix 1

Table A1 The PTA (g) (mean value and CV of the three repeats) of all helmets at different impact points.

| Helmets    | Technology | Impact locations |                |                |               |                | Mean ± SD  |
|------------|------------|------------------|----------------|----------------|---------------|----------------|------------|
|            |            | 1                | 2              | 3              | 4             | 5              |            |
| HJC        | None       | 166.5 (2.7%)     | 134.7 (4.9%)   | 163.2 (2.9%)   | 157.1 (0.7%)  | 171.7 (0.7%)   | 158.6±12.9 |
| B.Q        |            | 165.6 (3.6%)     | 136.1 (3.6%)   | 148.8 (4.8%)   | 161.3 (1.4%)  | 170.6 (2.3%)   | 156.5±12.5 |
| I.A        |            | 159.5 (3.9%)     | 131.3 (6.0%)   | 159.1 (2.1%)   | 159.5 (0.5%)  | 119.3 (7.2%)   | 145.7±17.1 |
| B.Q-MIPS   | MIPS       | 154.5 (2.2%)     | 139.8 (3.3%)   | 150.7 (6.8%)   | 151.3 (1.9%)  | 155.3 (11.8%)  | 150.3±5.6  |
| I.A-MIPS   | MIPS       | 150.7 (5.2%)     | 118.6 (5.7%)   | 135.4 (4.2%)   | 147.1 (1.7%)  | 102.3 (10.6%)  | 130.8±18.1 |
| B.R.S-Flex | Flex       | 155.8 (3.4%)     | 99.5 (5.7%)    | 174.1 (1.8%)   | 163.9 (6.9%)  | 125.4 (8.2%)   | 143.7±27.4 |
| 6D-ODS     | ODS        | 156.7 (3.9%)     | 135.7 (3.0%)   | 173.6 (8.1%)   | 165.4 (3.9%)  | 120.5 (3.5%)   | 150.4±19.6 |
| Mean ± SD  |            | 158.5±<br>5.4    | 127.9±<br>13.2 | 157.8±<br>13.0 | 157.9±<br>6.2 | 137.9±<br>25.6 |            |

Table A2 The PRA (rad/s<sup>2</sup>) (mean value and CV of the three repeats) of all helmets at different impact point.

| Helmets    | Technology | Impact locations |               |               |               |               | Mean ± SD |
|------------|------------|------------------|---------------|---------------|---------------|---------------|-----------|
|            |            | 1                | 2             | 3             | 4             | 5             |           |
| HJC        | None       | 8700 (12.8%)     | 11020 (1.6%)  | 10328 (2.1%)  | 8739 (9.1%)   | 10263 (4.3%)  | 9810±929  |
| B.Q        |            | 11268 (5.0%)     | 9202 (3.7%)   | 8095 (11.8%)  | 10119 (5.2%)  | 11198 (4.3%)  | 9976±1210 |
| I.A        |            | 9498 (6.7%)      | 10339 (9.9%)  | 10393 (6.3%)  | 10067 (0.6%)  | 11186 (1.2%)  | 10297±546 |
| B.Q-MIPS   | MIPS       | 7578 (7.3%)      | 7502 (4.6%)   | 7202 (5.3%)   | 8013 (2.0%)   | 8059 (2.1%)   | 7671±324  |
| I.A-MIPS   | MIPS       | 5868 (7.4%)      | 6929 (4.4%)   | 4717 (5.6%)   | 7052 (6.3%)   | 6028 (2.8%)   | 6119±844  |
| B.R.S-Flex | Flex       | 7236 (0.7%)      | 9086 (2.5%)   | 8574 (4.0%)   | 7352 (6.8%)   | 8213 (3.6%)   | 8092±709  |
| 6D-ODS     | ODS        | 9125 (5.4%)      | 10985 (4.0%)  | 10702 (4.3%)  | 8483 (12.9%)  | 10664 (6.8%)  | 9992±997  |
| Mean ± SD  |            | 8468±<br>1624    | 9295±<br>1502 | 8573±<br>1996 | 8546±<br>1119 | 9373±<br>1826 |           |

Table A3 The PRV (rad/s) (mean value and CV of the three repeats) of all helmets at different impact points.

| Helmets    | Technology | Impact locations |              |              |              |              | Mean ± SD |
|------------|------------|------------------|--------------|--------------|--------------|--------------|-----------|
|            |            | 1                | 2            | 3            | 4            | 5            |           |
| HJC        | None       | 39.1 (1.9%)      | 39.9 (2.6%)  | 35.1 (1.5%)  | 42.4 (1.4%)  | 36.1 (2.0%)  | 38.5±2.6  |
| B.Q        |            | 45.5 (4.6%)      | 39.5 (2.8%)  | 33.3 (4.2%)  | 47.8 (1.2%)  | 38.1 (4.1%)  | 40.8±5.2  |
| I.A        |            | 42.5 (3.4%)      | 42.0 (5.0%)  | 34.9 (1.0%)  | 48.5 (3.4%)  | 42.4 (1.3%)  | 42.1±4.3  |
| B.Q-MIPS   | MIPS       | 38.1 (1.5%)      | 37.3 (1.1%)  | 30.6 (4.9%)  | 44.5 (4.4%)  | 30.2 (6.8%)  | 36.1±5.3  |
| I.A-MIPS   | MIPS       | 38.3 (2.7%)      | 36.5 (3.2%)  | 26.7 (2.1%)  | 41.7 (1.9%)  | 34.4 (4.7%)  | 35.5±5.0  |
| B.R.S-Flex | Flex       | 38.9 (0.5%)      | 44.0 (1.1%)  | 34.2 (1.3%)  | 42.5 (2.9%)  | 37.2 (0.8%)  | 39.4±3.6  |
| 6D-ODS     | ODS        | 41.7 (1.0%)      | 39.1 (0.9%)  | 34.8 (2.5%)  | 39.9 (5.2%)  | 39.3 (3.1%)  | 39.0±2.3  |
| Mean ± SD  |            | 40.6±<br>2.6     | 39.8±<br>2.4 | 32.8±<br>2.9 | 43.9±<br>3.0 | 36.8±<br>3.6 |           |

Table A4 The BrIC (mean value and CV of the three repeats) of all helmets at different impact points.

| Helmets | Technology | Impact locations |             |             |             |             | Mean ± SD |
|---------|------------|------------------|-------------|-------------|-------------|-------------|-----------|
|         |            | 1                | 2           | 3           | 4           | 5           |           |
| HJC     | None       | 0.69 (0.9%)      | 0.71 (2.3%) | 0.55 (1.9%) | 0.76 (1.4%) | 0.62 (1.7%) | 0.67±0.07 |
| B.Q     |            | 0.80 (5.1%)      | 0.70 (2.7%) | 0.53 (2.6%) | 0.85 (1.5%) | 0.68 (4.1%) | 0.71±0.11 |

|            |      |               |               |               |               |               |           |
|------------|------|---------------|---------------|---------------|---------------|---------------|-----------|
| I.A        |      | 0.76 (4.9%)   | 0.75 (4.9%)   | 0.54 (1.6%)   | 0.87 (3.5%)   | 0.72 (0.8%)   | 0.73±0.11 |
| B.Q-MIPS   | MIPS | 0.66 (2.0%)   | 0.66 (1.1%)   | 0.47 (5.3%)   | 0.80 (4.2%)   | 0.57 (3.6%)   | 0.63±0.11 |
| I.A-MIPS   | MIPS | 0.68 (3.4%)   | 0.65 (3.2%)   | 0.42 (2.6%)   | 0.74 (2.1%)   | 0.61 (3.2%)   | 0.62±0.11 |
| B.R.S-Flex | Flex | 0.68 (0.5%)   | 0.78 (1.0%)   | 0.53 (1.6%)   | 0.76 (2.9%)   | 0.67 (1.8%)   | 0.68±0.09 |
| 6D-ODS     | ODS  | 0.73 (0.7%)   | 0.69 (0.8%)   | 0.55 (3.5%)   | 0.71 (4.8%)   | 0.68 (2.6%)   | 0.67±0.06 |
| Mean ± SD  |      | 0.71±<br>0.05 | 0.71±<br>0.04 | 0.51±<br>0.05 | 0.78±<br>0.05 | 0.65±<br>0.05 |           |

Table A5 The 90<sup>th</sup> strain of the entire brain (mean value and CV of the three repeats) of all helmets at different impact points.

| Helmets    | Technology | Impact locations |               |               |               |               | Mean ± SD |
|------------|------------|------------------|---------------|---------------|---------------|---------------|-----------|
|            |            | 1                | 2             | 3             | 4             | 5             |           |
| HJC        | None       | 0.41 (2.6%)      | 0.44 (2.4%)   | 0.39 (2.2%)   | 0.41 (1.6%)   | 0.41 (2.0%)   | 0.41±0.02 |
| B.Q        |            | 0.49 (4.1%)      | 0.40 (5.3%)   | 0.35 (5.6%)   | 0.48 (1.3%)   | 0.43 (6.0%)   | 0.43±0.05 |
| I.A        |            | 0.45 (3.6%)      | 0.41 (9.5%)   | 0.38 (0.6%)   | 0.49 (2.6%)   | 0.47 (0.8%)   | 0.44±0.04 |
| B.Q-MIPS   | MIPS       | 0.39 (2.8%)      | 0.36 (3.2%)   | 0.32 (6.4%)   | 0.42 (2.7%)   | 0.34 (3.9%)   | 0.37±0.04 |
| I.A-MIPS   | MIPS       | 0.35 (3.0%)      | 0.33 (4.0%)   | 0.26 (2.9%)   | 0.37 (2.5%)   | 0.34 (5.4%)   | 0.33±0.04 |
| B.R.S-Flex | Flex       | 0.38 (4.0%)      | 0.44 (1.3%)   | 0.34 (4.1%)   | 0.40 (3.8%)   | 0.41 (2.1%)   | 0.39±0.03 |
| 6D-ODS     | ODS        | 0.43 (0.6%)      | 0.42 (1.2%)   | 0.38 (2.6%)   | 0.40 (7.7%)   | 0.44 (3.4%)   | 0.41±0.02 |
| Mean ± SD  |            | 0.41±<br>0.04    | 0.40±<br>0.04 | 0.35±<br>0.04 | 0.42±<br>0.04 | 0.41±<br>0.05 |           |

Table A6 The 90<sup>th</sup> strain of the corpus callosum (mean value and CV of the three repeats) of all helmets at different impact points.

| Helmets    | Technology | Impact locations |               |               |               |               | Mean ± SD |
|------------|------------|------------------|---------------|---------------|---------------|---------------|-----------|
|            |            | 1                | 2             | 3             | 4             | 5             |           |
| HJC        | None       | 0.28 (1.4%)      | 0.37 (2.2%)   | 0.23 (2.4%)   | 0.32 (1.1%)   | 0.28 (2.6%)   | 0.30±0.05 |
| B.Q        |            | 0.33 (6.7%)      | 0.37 (4.9%)   | 0.21 (5.9%)   | 0.37 (2.0%)   | 0.32 (4.8%)   | 0.32±0.06 |
| I.A        |            | 0.31 (6.5%)      | 0.39 (6.7%)   | 0.23 (0.8%)   | 0.38 (2.8%)   | 0.34 (3.1%)   | 0.33±0.06 |
| B.Q-MIPS   | MIPS       | 0.26 (4.8%)      | 0.35 (2.7%)   | 0.20 (8.1%)   | 0.34 (3.8%)   | 0.25 (8.3%)   | 0.28±0.06 |
| I.A-MIPS   | MIPS       | 0.25 (5.2%)      | 0.33 (4.0%)   | 0.15 (3.7%)   | 0.31 (2.8%)   | 0.25 (3.8%)   | 0.26±0.06 |
| B.R.S-Flex | Flex       | 0.26 (4.6%)      | 0.42 (1.1%)   | 0.22 (2.9%)   | 0.32 (2.7%)   | 0.32 (3.1%)   | 0.31±0.07 |
| 6D-ODS     | ODS        | 0.30 (6.6%)      | 0.37 (7.3%)   | 0.23 (1.4%)   | 0.31 (7.1%)   | 0.32 (3.9%)   | 0.31±0.04 |
| Mean ± SD  |            | 0.28±<br>0.03    | 0.37±<br>0.03 | 0.21±<br>0.03 | 0.34±<br>0.03 | 0.30±<br>0.03 |           |

Table A7 The mean strain of the sulci (mean value and CV of the three repeats) of all helmets at different impact points.

| Helmets    | Technology | Impact locations |               |               |               |               | Mean ± SD |
|------------|------------|------------------|---------------|---------------|---------------|---------------|-----------|
|            |            | 1                | 2             | 3             | 4             | 5             |           |
| HJC        | None       | 0.29 (2.6%)      | 0.31 (2.3%)   | 0.28 (1.9%)   | 0.30 (1.5%)   | 0.29 (1.7%)   | 0.29±0.01 |
| B.Q        |            | 0.35 (4.9%)      | 0.29 (4.7%)   | 0.26 (4.8%)   | 0.35 (1.4%)   | 0.30 (6.0%)   | 0.31±0.03 |
| I.A        |            | 0.33 (4.6%)      | 0.31 (8.5%)   | 0.27 (0.7%)   | 0.35 (2.7%)   | 0.34 (0.5%)   | 0.32±0.03 |
| B.Q-MIPS   | MIPS       | 0.27 (3.0%)      | 0.27 (3.0%)   | 0.23 (6.6%)   | 0.31 (2.7%)   | 0.25 (2.9%)   | 0.27±0.03 |
| I.A-MIPS   | MIPS       | 0.25 (3.6%)      | 0.25 (3.8%)   | 0.18 (3.1%)   | 0.27 (2.1%)   | 0.25 (5.3%)   | 0.24±0.03 |
| B.R.S-Flex | Flex       | 0.26 (4.2%)      | 0.33 (1.2%)   | 0.25 (3.3%)   | 0.29 (3.4%)   | 0.31 (4.4%)   | 0.29±0.03 |
| 6D-ODS     | ODS        | 0.30 (1.1%)      | 0.30 (1.2%)   | 0.27 (2.9%)   | 0.29 (7.3%)   | 0.31 (3.2%)   | 0.30±0.01 |
| Mean ± SD  |            | 0.29±<br>0.03    | 0.29±<br>0.02 | 0.25±<br>0.03 | 0.31±<br>0.03 | 0.29±<br>0.03 |           |

## Appendix 2

### Verification of using the masking tape to fix the helmeted headform

In the tests, we used masking tape to temporarily fix the helmet onto the platform. This maintained the helmet's position and orientation during the free fall. The width of the masking tape was 48mm and half-width of the tape was pre-cut at several locations to ensure an easy tear during the impact. To determine the effect of the masking tape on the headform kinematics during the oblique impact, we used bicycle helmets, rather than motorcycle helmets, because the headform is more visible when fitted with bicycle helmets. This allowed us to compare headform movements across different test conditions.

Table A8 shows the test matrix. We used 6 helmet samples and conducted 18 oblique tests at 6m/s impact velocity. In 9 tests, the helmets were fixed with the masking tape and in the other 9 tests, no tapes were used. With each helmet sample, we conducted three impacts at the front, side and rear-side of the helmet. For the rear-side impact, the angle between the headform's sagittal plane and the anvil middle plane was 45° in order to produce a more complex impact response than a pure rear impact. The tests were repeated three times using a new helmet.

We first compared the head movement between the with/without tape experiments using the video recorded by the high-speed video camera. As shown in Figure A1, we selected the snapshots at the same time, which is 29.4ms after camera triggering. At this time, the impact between the helmet and the anvil has finished. We also overlaid the snapshots of the tests with the masking tape (50% transparency) on the those without. The comparisons show that the headform and helmet motion are very similar between the tests with and without the masking tape.

Next, we processed the acceleration data of each test to obtain the four brain injury metrics (PTA, PRA, PRV and BrIC). We conducted one-way ANOVA with the presence of the masking tape as the factor to determine the effects of the tape on the injury metrics. The results show that for all the three impact locations, using the masking tape did not have a significant effect on the injury metrics (Table A9-A12).

In summary, these results verified that using the masking tape did not affect the headform kinematics. Compared with these tests, motorcycle helmets were tested at a higher speed (8m/s), leading to much higher impact force and energy. As the tearing force of the masking tape is the same, the effects of the on the head kinematics in motorcycle helmet tests should have been negligible.

Table A8 The test matrix for investigating the effects of using masking tape.

| Test number | Helmet sample | Impact location | Masking tape |
|-------------|---------------|-----------------|--------------|
| 1           | 1             | Front           | Yes          |
| 2           | 2             | Front           | Yes          |
| 3           | 3             | Front           | Yes          |
| 4           | 4             | Front           | No           |
| 5           | 5             | Front           | No           |
| 6           | 6             | Front           | No           |
| 7           | 1             | Side            | Yes          |
| 8           | 2             | Side            | Yes          |

|    |   |           |     |
|----|---|-----------|-----|
| 9  | 3 | Side      | Yes |
| 10 | 4 | Side      | No  |
| 11 | 5 | Side      | No  |
| 12 | 6 | Side      | No  |
| 13 | 1 | Rear-side | Yes |
| 14 | 2 | Rear-side | Yes |
| 15 | 3 | Rear-side | Yes |
| 16 | 4 | Rear-side | No  |
| 17 | 5 | Rear-side | No  |
| 18 | 6 | Rear-side | No  |

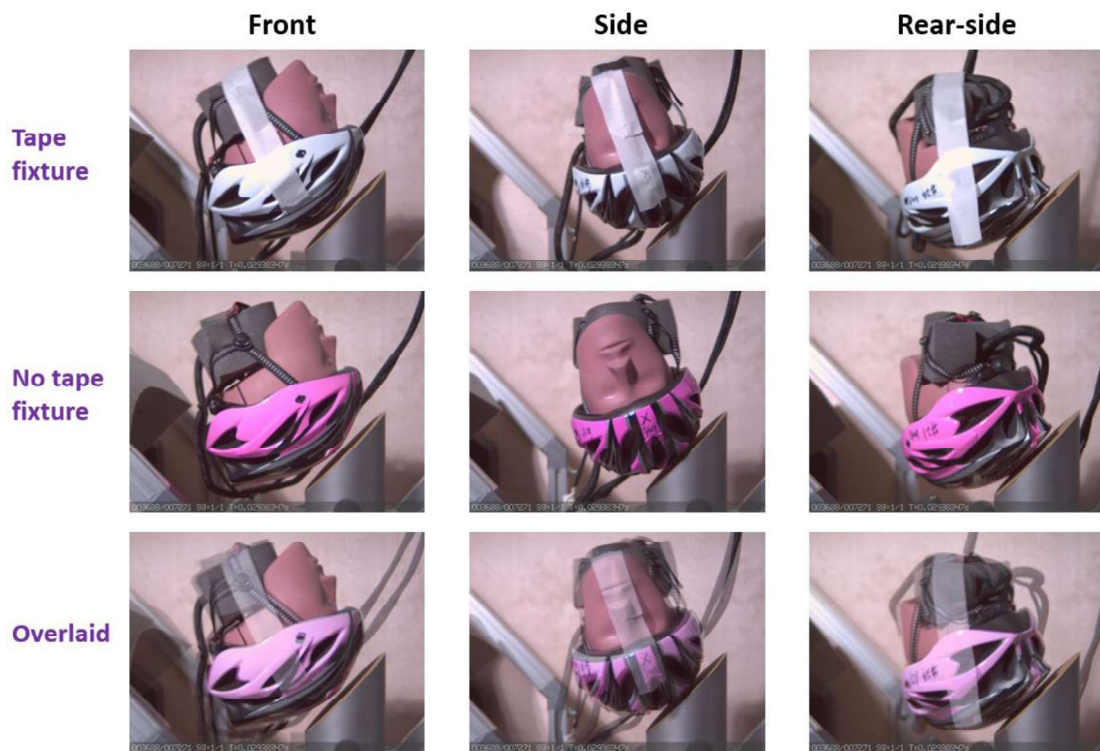

Figure A1 Snapshots (29.4ms after camera triggering) from the high-speed videos of the tests with and without masking tape, and the snapshots of the tests with masking tape (50% transparency) overlaid on those without masking tape fixture.

Table A9 The PTA (g) of all tests at different impact locations.

| Impact location | Front   |       | Side    |       | Rear-side |      |
|-----------------|---------|-------|---------|-------|-----------|------|
|                 | Yes     | No    | Yes     | No    | Yes       | No   |
| Repeat 1        | 129.5   | 123.0 | 124.6   | 121.6 | 68.0      | 83.5 |
| Repeat 2        | 121.3   | 128.1 | 124.0   | 124.4 | 68.7      | 73.4 |
| Repeat 3        | 125.4   | 125.5 | 122.9   | 120.5 | 79.8      | 61.4 |
| One-way ANOVA   | p=0.961 |       | p=0.263 |       | p=0.939   |      |

Table A10 The PRA (rad/s<sup>2</sup>) of all tests at different impact locations.

| Impact location | Front  |      | Side    |      | Rear-side |      |
|-----------------|--------|------|---------|------|-----------|------|
| Tape            | Yes    | No   | Yes     | No   | Yes       | No   |
| Repeat 1        | 8607   | 8290 | 5345    | 8305 | 6268      | 7796 |
| Repeat 2        | 8280   | 9094 | 5886    | 6736 | 6648      | 7670 |
| Repeat 3        | 8790   | 8466 | 5571    | 5715 | 7699      | 6964 |
| One-way ANOVA   | p=0.85 |      | p=0.162 |      | p=0.293   |      |

Table A11 The PRV (rad/s) of all tests at different impact locations.

| Impact location | Front   |      | Side    |      | Rear-side |      |
|-----------------|---------|------|---------|------|-----------|------|
| Tape            | Yes     | No   | Yes     | No   | Yes       | No   |
| Repeat 1        | 37.6    | 37.6 | 26.1    | 33.3 | 36.5      | 39.6 |
| Repeat 2        | 37.2    | 38.1 | 27.2    | 29.5 | 38.7      | 41.5 |
| Repeat 3        | 37.2    | 37.2 | 26.6    | 27.5 | 40.0      | 41.6 |
| One-way ANOVA   | p=0.355 |      | p=0.115 |      | p=0.109   |      |

Table A12 The BrIC of all tests at different impact locations.

| Impact location | Front   |      | Side    |      | Rear-side |      |
|-----------------|---------|------|---------|------|-----------|------|
| Tape            | Yes     | No   | Yes     | No   | Yes       | No   |
| Repeat 1        | 0.67    | 0.67 | 0.42    | 0.54 | 0.65      | 0.71 |
| Repeat 2        | 0.66    | 0.68 | 0.47    | 0.48 | 0.69      | 0.74 |
| Repeat 3        | 0.66    | 0.67 | 0.42    | 0.44 | 0.71      | 0.77 |
| One-way ANOVA   | p=0.239 |      | p=0.229 |      | p=0.0779  |      |
